# Supplementary material for: Cultivating partnerships to incorporate health promotion modules into primary school curricula: a case study in France
Source: Frontiers journal article supplement (doi:10.3389/feduc.2024.1498753), 2024-11-13
Supplement: Data_Sheet_1.xlsx [file Data_Sheet_1.xlsx]

## Sheet: Sheet1
	Study/Website	Program	Location	Type	Setting	Ages	Objectives	Mechanisms	Outcome measures
	Breheny, K., et al., 2020 (40)	The Daily Mile	Birmingham, UK	Journal article	40 Primary schools	7-10 years old	1 mile (1.6km) daily walk	On-site PA during school hours, run or walk 15-minutes/day or equivalent to 1-mile (1.6km	BMI, fitness, body fat percentage, child-reported quality of life, child-wellbeing and teacher-rated academic attainment; Economic analysis based on QALYs
	Burt, K.G., et al., 2017 (23)	GREEN (Garden Resources, Education, and Environment Nexus) Tool	NYC, USA	Journal article	Primary and middle school and community gardens close to schools	5-12 years old	Connect gardens across academic subjects of science, social studies, writing and math, instill healthy, environmental conscious values, plan garden maintenance and sustainability	Provide a tool to help integrate gardens into school curriculum	Four primary domains for success: Resources and support, Physical garden, Student experiences, School community
	Butler J, et al., 2011 (41)	School Health Index	Pennsylvania, USA	Journal article	18 Middle schools	12-14 years old	Use the SHI to plan and develop collaborations to launch a comprehensive health promotion campaign to lower obesity	Self-assessment modules aimed at Physical education and nutrition services	8-year HP campaign using the School Health Index to develop partnerships and plan interventions with the Comprensive School Health Promotion framework
	Davis, J,N,,et al., 2015 (36)	Systematic review of school garden impact on dietary behaviors	Australia & USA	Journal article	School-based gardens during or after school	5-13 years old (K-8th grade)	On-site school garden; workshops after school, in-class lessons	Fresh produce, obesity, chronic disease risk, high risk behaviors, vanalism, academic achievement, pride, nutrition knowledge, parent involvement, community cohesiveness, conservation practices	Includes effects at the school level, student level and family level
	Hoover, A., et al., 2021 (15)	Stakeholder questionnaire to understand school-based garden sustainability	Texas, USA	Journal article	School garden nutrition program	4-18 years old (pre-K to high school)	Identify strategies, barriers and resources for sustainable school gardens	Survey of school stakeholders regarding school-based garden sustainability	Successful gardens were those that were funded and had community partners, administrative support, teacher training, committee involvement, curriculum
	Mouans-Sartoux's Territorial Agri-Food Project	MEAD	Mouans-Sartoux, FR	Website	Communities	all	Enable all residents to eat healthy, take care of the environment, prevserve food-producing areas through community gardens and education	Culitvate local gardens, provide workshops to educate, teach cooking and nutrition	N/A
	Edible Schoolyard Training Program	The Edible Schoolyard Project	California, USA	Website	Schools, cafeterias, communities	all	Training program to learn how to seed and used gardens to educate	Tearching how to implement a curriculum with schoolyard gardens	N/A
	Cornell College of Agriculture and Life Sciences	Cornell Garden-Based Learning: Project S.O.W.	New York, USA	University program	School, aftershool or community	all	Investigate how to grow food, explore relationship with the land and food system, and practice community leadership	Multiple activities from one day to 6-weeks or incorporate into a curriculum	N/A
	Green Bronx Machine	Green Bronx Machine	Bronx, USA	Website	Urban primary to high schools	5-18 years old	Align the art and science of growing vegetables with daily academic instruction in multiple subjects	Urban tower gardens in disadvantaged schools, provides a 9-week curriculum for arts and sciences to learn critical thinking, problem solving	N/A
	Growing School Gardens	Seeding Healthy Futures	International	Website	On-site school gardens	4-18 years old	Increase FV intake, engage in learning, science achievement, academic achievement, language learning, teamwork, resilience, responsibility, environmental concern	Provide teaching, tools, education seminars, help with garden set up	N/A
	LifeLab	LifeLab	California, USA	Website	Primary to high schools	5-18 years old	Garden and farm-based learning	Partner with schools to teach how to implement a garden and integrate academics	N/A
	St-Martin de Porres Whole School approach curriculum	St. Martin de Porres	Mosely, UK	Website	Private Primary school	5-10 years old	School garden and forest	Incorporated into social teaching, science, design & technology courses	N/A
	Jenkinson, K., et al., 2013 (44)	Systematic review	Various	Journal article	Primary school to high school	5-18 years old	Peer led PA, sports and Physical education courses both during school hours and perischolar	Peer training followed by implementation	Anthorpometric measures, healthand nutrition behaviors, class behaviors, motor skill development, psychosocial
	Landry, M.J., et al., 2021 (37)	Texas Sprouts	Texas, USA	Journal article	On-site primary school school garden	8-10 years old (3rd-5th grade)	Gardening, cooking, and nutrition program	18 lessons with taste testing, cooking, sampling, recipes, activities in the garden, nutrition education; parents were included in 9 lessons	Dietary intake, obesity, blood pressure, psychosoical variables, academic performance, PA, diabetes, metabolic biomarkers
	Lohr, A.M., et al., 2021 (38)	Scoping review	Various	Journal article	Primary to high school gardens and gardening projects	6-18 years old	Evaluate effects on soical and emotional learning of school gardens	All included gardening with various methods, in kitchen or on-site	Interpersonal relationships, life skills, teamwork, self-esteem, confidence, achievement, problem solving, emotional well-being, solidarity
	Monferrer, L., et al., 2022 (39)	Systematic review	Various	Journal article	Primary to high school gardens	3-16 years old	Using gardens to teach math and science	Teaching math and experimental sciences in the context of cultivating and harvesting a school garden	Interest in experimental sciences, attitudes for math and science, scores for math and science, educational community, ecology, nutrition, creativity, academic performance
	Morris, J.L., et al., 2019 (42)	The Daily Mile	Yorkshire, UK	Journal article	11 Primary schools	8-10 years old	1 mile (1.6km) daily walk	On-site walks during school hours	Executive function, academic performance (math), PA levels via accelerometers; Anthorpometric and fitness assessments
	Qi, Y., et al., 2021 (43)	Systematic review of PA interventions and/or school gardens	Various	Journal article	Primary to middle schools	7-12 years old	Gardening to improve BMI, FV intake and knowledge, weight control, lower sugary food/drink intake	On-site school gardens, two studies included a PA intervention	Increase children’s FVs and improve their intake motivation, attitude, and preference for vegetables and fruits
